# Supplementary material for: Significant Shifts in Microbial Communities Associated with Scleractinian Corals in Response to Algae Overgrowth
Source: MDPI journal article supplement (doi:10.3390/microorganisms10112196), 2022-11-05
Supplement: s1 [file s1]

**Figure. S1** The UPGMA tree of coral samples is based on the Unweighted Unifrac distance matrix. A, B, and C represent *Montipora sp.*, *Platygyra sp.*, and *Pocillopora sp.*, respectively. 1,2 and 3 represented HH, HA and AA samples, respectively.

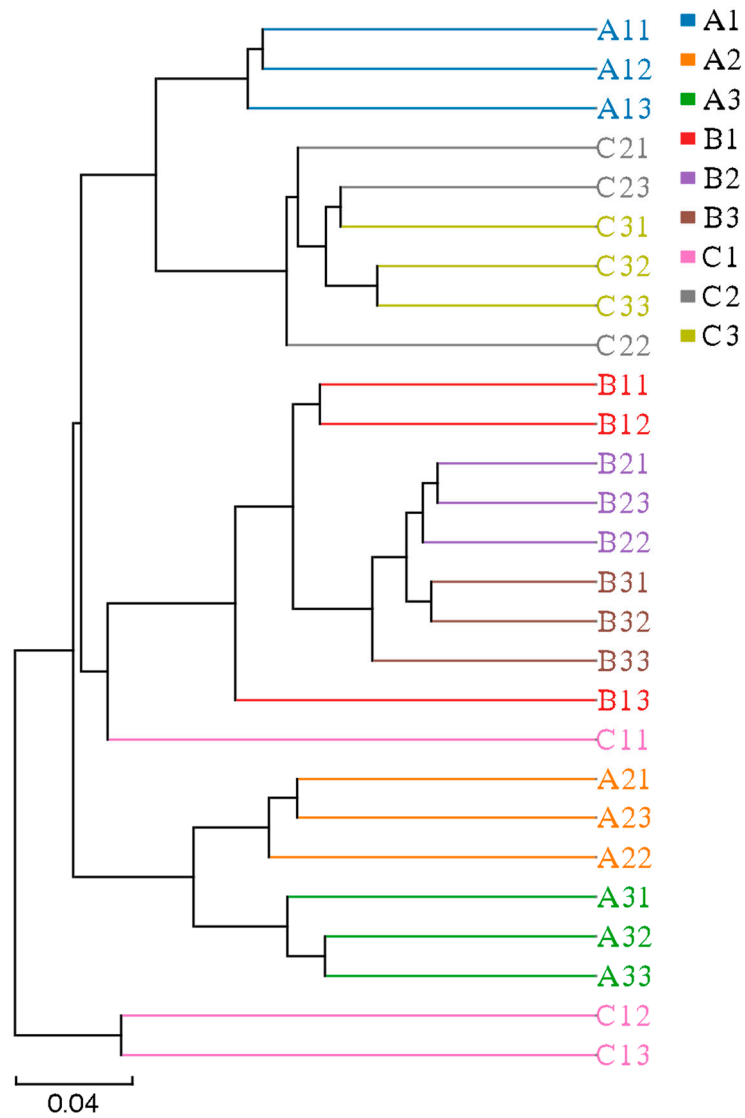

**Figure. S2** Relative abundance (%) of major bacterial communities at the class level.

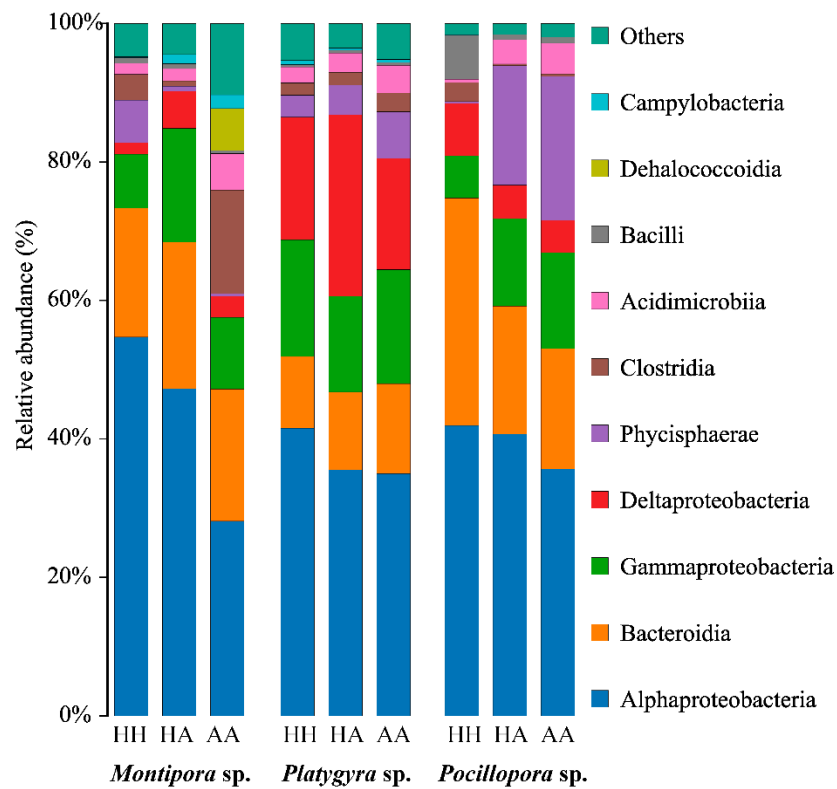

**Table S1** Number of bacteria obtained at all taxonomic levels in 3 coral genera

| Coral genus            | Condition | Phylum | Class | Order | Family | Genus |
|------------------------|-----------|--------|-------|-------|--------|-------|
| <i>Pocillopora</i> sp. | HH        | 23     | 54    | 122   | 221    | 389   |
|                        | HD        | 22     | 48    | 115   | 215    | 391   |
|                        | DD        | 24     | 53    | 121   | 221    | 397   |
| <i>Montipora</i> sp.   | HH        | 23     | 49    | 121   | 218    | 382   |
|                        | HD        | 23     | 48    | 117   | 212    | 384   |
|                        | DD        | 22     | 50    | 118   | 215    | 380   |
| <i>Platygyra</i> sp.   | HH        | 23     | 50    | 117   | 213    | 358   |
|                        | HD        | 21     | 47    | 116   | 212    | 375   |
|                        | DD        | 23     | 50    | 120   | 221    | 396   |

**Table S2** Relative abundance (%) of some important bacterial communities at the genus level.

| Coral genus            | Condition | Relative abundance (%) |                   |                      |
|------------------------|-----------|------------------------|-------------------|----------------------|
|                        |           | <i>Vibrio</i>          | <i>Arcobacter</i> | <i>Desulfovibrio</i> |
| <i>Montipora</i> sp.   | HH        | 0.123                  | 0.119             | 0.009                |
|                        | HA        | 2.606                  | 1.329             | 0.003                |
|                        | AA        | 0.358                  | 1.984             | 0.003                |
| <i>Platygyra</i> sp.   | HH        | 0.292                  | 0.230             | 0.211                |
|                        | HA        | 0.401                  | 0.041             | 0.072                |
|                        | AA        | 0.594                  | 0.004             | 0.101                |
| <i>Pocillopora</i> sp. | HH        | 0.216                  | 0.018             | 0.084                |
|                        | HA        | 0.127                  | 0.002             | 0.005                |
|                        | AA        | 0.311                  | 0.009             | 0.004                |
